1                   **Social Support during pregnancy: A phenomenological**  
2                   **exploration of young women’s experiences of support**  
3                   **networks on pregnancy care and wellbeing in Soweto, South**  
4                   **Africa.**

6                   **Expectant young women’s experience of social support**

8                   Khuthala Mabetha<sup>1\*</sup>, Larske Soepnel<sup>1,2</sup>, Sonja Klingberg<sup>1</sup>, Gugulethu Mabena<sup>1</sup>, Molebogeng  
9                   Motlhatlhed<sup>1</sup>, Shane A Norris<sup>1</sup>, Catherine E Draper<sup>1</sup>

11                   <sup>1</sup>SAMRC/Wits Developmental Pathways for Health Research Unit, Department of Paediatrics,  
12                   Faculty of Health Sciences, School of Clinical Medicine, University of the Witwatersrand,  
13                   Johannesburg, South Africa; [Khuthala.Mabetha@wits.ac.za](mailto:Khuthala.Mabetha@wits.ac.za) (KM); [Larske.Soepnel@wits.ac.za](mailto:Larske.Soepnel@wits.ac.za)  
14                   (LS); [Sonja.Klingberg@wits.ac.za](mailto:Sonja.Klingberg@wits.ac.za) (SK); [Gugulethu.Mabena@wits.ac.za](mailto:Gugulethu.Mabena@wits.ac.za) (GM);  
15                   [Lebo.Motlhatlhed@wits.ac.za](mailto:Lebo.Motlhatlhed@wits.ac.za); [Shane.Norris@wits.ac.za](mailto:Shane.Norris@wits.ac.za) (SN); [Catherine.Draper@wits.ac.za](mailto:Catherine.Draper@wits.ac.za)  
16                   (CD)

17                   <sup>2</sup>Julius Global Health, Julius Centre for Health Sciences and Primary Care, University Medical  
18                   Centre. Utrecht, Utrecht University, Utrecht, The Netherlands.

21                   \*Corresponding author: [Khuthala.Mabetha@wits.ac.za](mailto:Khuthala.Mabetha@wits.ac.za)

24  
25

## 26 **Abstract**

27 Social support is deemed to have a crucial influence on maternal health and wellbeing during  
28 pregnancy. The objective of the study was to explore the experiences of pregnant young females  
29 and their receipt of social support in Soweto, South Africa. An interpretive phenomenological  
30 approach was employed to understand and interpret pregnant young women's lived experiences of  
31 support networks on their pregnancy care and wellbeing. Data was collected conducting 18 indepth  
32 interviews with young pregnant women. Analysis of the data resulted in the development of two  
33 superordinate themes: (1) relationships during pregnancy and (2) network involvement. Each  
34 superordinate theme was linked to subthemes that helped explain whether young women had  
35 positive or negative experiences of social support during their pregnancy care, and their wellbeing.  
36 The sub-themes emanating from the superordinate theme 'relationships during pregnancy' were  
37 (a) behavioural response of partner following disclosure of pregnancy, (b) behavioural response  
38 of family following disclosure of pregnancy, and (c) sense of emotional security. Accompanying  
39 subthemes of the superordinate theme 'network involvement' were (a) emotional and instrumental  
40 support, and (b) information support. An interpretation of the young women's experiences has  
41 revealed that young women's satisfaction with existing support networks and involvement of the  
42 various social networks contributed greatly to the participants having a greater sense of potential  
43 parental efficacy and increased acceptance of their pregnancies. Pregnant women who receive  
44 sufficient social support from immediate networks have increased potential to embrace and give  
45 attention to pregnancy-related changes. This could, in turn, foster positive behavioural outcomes  
46 that encourage engaging in good pregnancy care practices and acceptance of motherhood.

47 Focusing on previously unexamined factors that could improve maternal health, such as social  
48 support, could improve maternal mortality rates and help achieve reproductive health accessibility  
49 universally.

50

51

52

53

54

55

56

57

58

59

60

61

62

63

64

65

## 66 **Introduction**

67 Social support has been reported to play a crucial role in maternal health and wellbeing (1),  
68 influencing individuals' ability to cope with events during specific periods (2). Social support is  
69 characterised by the manner in which connections that exist between people who have recurring  
70 interactions, fulfil the needs of individuals and this form of support can exist in an emotional,  
71 instrumental, affectionate or tangible form (3). The prenatal period is considered to be a delicate  
72 time particularly in view of the emotional, psychological and social wellbeing of expectant  
73 mothers (4). Pregnancy is generally viewed as a period that is coupled with various physiological  
74 and emotional changes, and these changes can have significant effects on both maternal and infant  
75 health outcomes (5-9). Close relations with other individuals play an integral role in influencing  
76 the quality of life of individuals which promotes positive wellbeing, subsequently resulting in  
77 expectant mothers perceiving pregnancy-related changes as less stressful (10). Thus, the care and  
78 support that pregnant woman receive contributes greatly to how they experience their pregnancy  
79 (11, 12).

80

81 A vast body of empirical evidence has been documented on the influence that social support has  
82 on the depressive symptoms that expectant women experience such as antenatal depression,  
83 postpartum depression, and subjective wellbeing amongst others (13-21). In particular, women  
84 who experience a lack of social contact or connection with others, and also perceive themselves to  
85 have low social support, have increased susceptibility to anxiety and antenatal depression,  
86 particularly if they have a strained relationship with their partner or family, which can subsequently  
87 affect various developmental outcomes of their babies (2, 22-30). Thus, social support may result

88 in reduced risks of depression during pregnancy subsequently resulting in positive pregnancy and  
89 health outcomes (31).

90  
91 Empirical evidence has shown that expectant mothers need support that involves undertaking  
92 tangible acts or activities, monitoring and care which promotes positive wellbeing and health for  
93 both mother and child (32). In addition, social support is deemed as important in strengthening  
94 positive health outcomes in families experiencing events that involve significant changes to their  
95 lifestyles such as the birth of a child or rearing of children (4, 33). Of note, significant differences  
96 have been observed with respect to the degree of social support received by adolescent mothers  
97 who are in the age groups 15 to 19 years and that of older mothers who are between the age groups  
98 25 and above (23, 27), with results indicating that adolescent mothers received lower levels of  
99 social support than older mothers due to their weakened capability to create and sustain close  
100 connections and social ties with other individuals (23, 27). Despite the prevalence of adolescent  
101 pregnancy being largely documented in South African literature, stigmatization of adolescent  
102 pregnancy in the country remains rife (34). Empirical evidence has shown that stigmatization of  
103 adolescent pregnancy has the potential to weaken or compromise an adolescent's social support  
104 systems, which influences the health of both the child and adolescent mother (35, 36).

105  
106 Although there are various studies, particularly from high-income countries, that have examined  
107 social support during pregnancy (31, 37-39), most studies have been limited to adolescents or older  
108 mothers and most have examined social support from a quantitative perspective while there is a  
109 dearth of phenomenological inquiry that captures the lived experiences of social support through

110 the in-depth narrative accounts of pregnant women. Additionally, studies that exist on social  
111 support have focused on partners' role on the health of young mothers which has been limited to  
112 paternal involvement defined only through the state of being married or not married or the  
113 inclusion of the name of the father on the child's birth certificate (6, 40-43). Moreover, most  
114 studies that focus on partner support have not been able to explain partner involvement and  
115 pregnancy outcomes as well as the type of support that partners offer, through more in-depth  
116 narrative accounts (6, 44, 45).

117  
118 The potential role that families play in childbearing practices of young women merits further  
119 research given that the majority of South African adolescent and young women have been reported  
120 not to be in a marital union and are also resident in their families' households during their  
121 pregnancy (46). Furthermore, several international studies have conducted research on social  
122 support initiatives that are specifically run by expectant mothers as well as professional initiatives  
123 during pregnancy (4, 47-52) leaving a gap regarding other forms of social support, such as family  
124 and peer support. The findings of these previous studies have shown that expectant females have  
125 obtained support from their peers and a therapeutic space in these support groups which has played  
126 a significant role in positive pregnancy outcomes and positive emotional wellbeing. In addition,  
127 pregnant women have received professional support through individualised education and  
128 supportive phone calls and other forms of support which are emotional, affirmational,  
129 informational and practical from both mother-to-mother support groups and healthcare providers,  
130 resulting in improved Quality of Life (QoL) during pregnancy (49). Also, receipt of social support  
131 has been mostly evident following the birth of a child (53). However, the need for social support  
132 is greater in the prenatal period.

133  
134 It remains unclear what type of support is received by expectant mothers from low- and middle-  
135 income country settings, in particular young women, as there is limited literature on the social  
136 support patterns on the wellbeing of this specific age group and a lack of in-depth understanding  
137 of their relationships. Given this background, the study's objective was to explore the lived  
138 experiences of young females' receipt of social support and how it relates to their pregnancy care  
139 and wellbeing during the prenatal period, through a phenomenological approach, in the context of  
140 a South African township called Soweto.

141

## 142 **Materials and methods**

### 143 **Study design**

144 An interpretive phenomenological design was employed in this study. The rationale for employing  
145 this approach is that its philosophical and methodological foundations in phenomenology seek to  
146 offer in-depth insight into the experiences of individuals through describing, comprehending and  
147 interpreting participants' experiences (54-56). Of note, individuals' experiences are influenced by  
148 the world they live in, including certain determining factors in their lives which are often linked to  
149 social, cultural or political contexts (57). Thus, interpretive phenomenology was suitable in this  
150 context as it assisted in gaining insight into young women's lived experience of receipt of social  
151 support regarding pregnancy care and wellbeing during pregnancy. Furthermore, this approach  
152 involves using semi-structured interviews and in-depth interviews and allows the researcher to  
153 search for meaning in the narrative accounts of participants (58).

154 This phenomenological view thus enables the researcher to try to make sense of the participant's  
155 experience whilst gaining insight into the participant trying to make sense of what they have  
156 experienced (59). Moreover, the phenomenological method contributes significantly to the  
157 analysis of study participants' narratives as it helps reveal the inner meaning or essence of a  
158 phenomenon (60). The phenomenological method employed here involves three central  
159 components: (1) bracketing, (2) analysis using imagination and instinct (3) describing (61).  
160 Bracketing implies that the researcher has preconceived notions, experiential knowledge or has  
161 certain expectations about the phenomenon under study but does not apply these elements during  
162 investigation (60).

163  
164 Bracketing in this study was however applied by putting aside the researchers' knowledge and  
165 beliefs about the phenomenon under study in order to accurately capture and describe the  
166 participants' experiences. In terms of imagination and intuition, the researcher examines the  
167 phenomenon under study open-mindedly and the process of describing involves explaining or  
168 describing a phenomenon as accurately as possible without depending on any pre-given framework  
169 (62).

170

## 171 **Setting**

172 The study took place at the Chris Hani Baragwanath Academic Hospital located in Soweto,  
173 Johannesburg, South Africa. It is nested in the Healthy Life Trajectories Initiative (HeLTI), and  
174 specifically the "*Bukhali*" randomised control trial that examines the effects of a complex  
175 intervention aimed at optimizing the health of young women preconception, during pregnancy,



176 and postnatally (63). Soweto is a historically disadvantaged and underprivileged high-density peri-  
177 urban area that lies in the outskirts of the city of Johannesburg, with 1.3 million residing in the  
178 area (64). Although Soweto is characterized by diverse economic structures and activities, poverty  
179 related challenges remain rife in the area with food insecurity and unemployment being highly  
180 prevalent (65). The majority of the population residing in Soweto is deemed to have poor or limited  
181 access to appropriate healthcare services, particularly, youth-friendly services (66). Soweto is an  
182 area that can be deemed to be largely characterized by patriarchy in which gender inequality and  
183 harmful gendered stereotypes dominate childbearing decisions of young women (67-69).  
184 Additionally, the introduction of various health initiatives among young women during their  
185 reproductive years is pivotal given that 33% of young women will experience adolescent  
186 pregnancy and give birth to their first child before their 19<sup>th</sup> birthday.

187

## 188 **Eligibility and participant recruitment**

189 The study adopted a purposive sampling approach as it assisted in selecting participants who share  
190 similar characteristics and meet the selection criteria. Eighteen pregnant participants who were in  
191 the age groups 18 to 28 years, were recruited from the *Bukhali* trial and were interviewed.  
192 Participants assigned to the intervention arm received health literacy material pertaining to  
193 physical and mental health, micronutrient supplements, and free access to HIV and pregnancy  
194 testing. The intervention is delivered monthly by community health workers over a period of up  
195 to 18 months' preconception, and continuing into pregnancy. Pregnancy specific material is  
196 provided to address healthy diet and healthy behaviours during pregnancy, and antenatal care

197 activities that pertain to birth preparation and the child's arrival (63). Participants in the control  
198 arm received information related to life skills and are also offered free HIV and pregnancy testing.  
199 Participants who had experienced a pregnancy loss were not recruited for this qualitative study.  
200 Due to the current blinding of the trial, combined results are reported for intervention and control  
201 participants.

202

## 203 **Data collection**

204 Participants participated in individual in-depth interviews in the month of August 2021 at the  
205 research centre within the precinct of Chris Hani Baragwanath Academic Hospital in Soweto.  
206 Interview guide questions were developed by the study team and used for prompting where  
207 necessary. Interview questions focused on young women's pregnancy experiences, support  
208 structures, health behaviours (antenatal care visits) and sources of information on pregnancy. Two  
209 local female interviewers fluent in both English and other South African vernacular languages  
210 conducted the interviews. Following COVID-19 safety protocols, the participants were  
211 interviewed in person in a comfortable and silent room that offered maximum privacy. An audio  
212 recorder was used and the interviews lasted between 45-60 minutes; notes were taken during each  
213 session in order to document key narratives and participants' non-verbal cues. Prior to analysis,  
214 the recorded narratives of the participants were transcribed verbatim and interviews that were  
215 conducted in the participants' native language were translated into English.

216

## 217 **Data analysis**

218 Colaizzi's seven-step method was used to analyze the data with the aid of MAXQDA software  
219 version 2020 (70) which assisted in recording and coding the interview transcripts. However, only  
220 six steps were employed in this study given that follow-up interviews did not take place in the  
221 seventh stage in order to validate our findings from the study participants. Colaizzi's method is an  
222 inductive method used in phenomenology that assists in selecting prominent assertions, classifying  
223 and thinking logically of the meanings of the event or outcome being investigated as well as  
224 describing and depicting the participants' experiences (71, 72). In the first step, we first checked  
225 the transcripts against the recordings and revisited the content so as to make sense of the lived  
226 experience of all the individual participants and to comprehend the feelings and thoughts of the  
227 young pregnant women. Next, we extracted significant phrases and statements from the transcripts  
228 that form a complete meaning of each participant's experience. This was done by further re-reading  
229 each transcript in order to point out prominent assertions from each interview transcript. We then  
230 wrote separate assertions for each individual. In the third step, we formulated more general  
231 meanings from each significant statement on the text. We then coded and categorized these  
232 meanings from the various transcripts and checked for consistency of the meanings across all  
233 transcripts. In the fourth step, after acquiring meanings emerging from the prominent assertions,  
234 we then arranged meanings into thematic clusters. Accompanying subthemes are shown in Table  
235 1.

236

237 Two superordinate themes were developed from the cluster of themes that adequately explained  
238 young women's experiences of social support on pregnancy care and wellbeing. Superordinate

239 themes and sub-themes were developed by mapping interrelationships, connections and patterns  
240 across the narratives through engaging with the recordings and revisiting each transcript several  
241 times. Several phrases were coded, and important phrases were identified resulting in the  
242 generation of the superordinate themes and sub-themes. In addition, for each superordinate theme,  
243 specific extracts for that theme were selected from different participants and placed under each  
244 relevant theme. This assisted us in achieving internal consistency and relative broadness of each  
245 superordinate theme. In the fifth step of analysis, we integrated all emerging themes into  
246 descriptions of the event or outcome being examined. This was done by bringing together all the  
247 thematic clusters, superordinate themes and generated meanings to create a structure that expressed  
248 the meaning in each theme (Table 1).

249 **Table 1. Themes focusing on young women’s experiences of social support on pregnancy**  
250 **care and wellbeing.**

| <b>Superordinate theme</b>        | <b>Sub-themes</b>                                                                                                                                                                   |
|-----------------------------------|-------------------------------------------------------------------------------------------------------------------------------------------------------------------------------------|
| 1. Relationships during pregnancy | 1.1. Behavioural response of partner following disclosure of pregnancy<br>1.2. Behavioural response of family following disclosure of pregnancy<br>1.3. Sense of emotional security |
| 2. Network Involvement            | 2.1. Emotional and Instrumental support<br>2.2. Information support (medical and cultural information support)                                                                      |

251

## 252 **Ethical Statement**

253 Approval to conduct the study was granted by the Human Research Ethics Committee (Medical)  
254 based at the University of the Witwatersrand (M190449). Participants were requested to sign an  
255 informed consent form which stipulated the aims of the study, guaranteed confidentiality and  
256 indicated that the study is voluntary. The informed consent form also provided information on who  
257 would have access to the participants' information, indicated that the study was voluntary, and  
258 provided information on the storage of data, recording of data and the dissemination of the  
259 findings. All participants who were willing to participate voluntarily and fully acknowledged that  
260 they understood the purpose of the research written permission to be interviewed, and for the  
261 narratives to be recorded.

262

## 263 **Results**

264 All 18 participants were between the age groups 18 to 28 years. Overall, three participants had a  
265 primary school qualification, ten had a secondary school qualification, two had a tertiary  
266 qualification and three participants did not complete their primary education. Only six participants  
267 were enrolled in a higher education institution. Almost all females (16) indicated being in a  
268 relationship when the interview took place with only four of the participants living or cohabiting  
269 with their partners and 14 living with their families. Nine young women reported that they had  
270 given birth before, with the current pregnancy being their second pregnancy. Sociodemographic  
271 details are provided for each participant in Table

272 2.



**Table 2. Demographic Profile of the participants.**

| <b>Participant code</b> | <b>Current age</b> | <b>Highest level of education attained</b> | <b>Currently enrolled in Higher Education Institute</b> | <b>Employment status</b> | <b>Lives with</b>             | <b>Relationship status</b>             | <b>Number of pregnancies</b> |
|-------------------------|--------------------|--------------------------------------------|---------------------------------------------------------|--------------------------|-------------------------------|----------------------------------------|------------------------------|
| Participant 1           | 21-25              | Secondary school qualification             | Yes                                                     | Unknown                  | Parents and siblings          | In a relationship, not living together | 1                            |
| Participant 2           | 21-25              | Secondary school qualification             | No                                                      | Unemployed               | Partner                       | In a relationship, and living together | 1                            |
| Participant 3           | 16-20              | Secondary school qualification             | No                                                      | Unemployed               | Parent and siblings           | Single                                 | 1                            |
| Participant 4           | 16-20              | Primary school qualification               | No                                                      | Unknown                  | Parent, relative and siblings | In a relationship, not living together | 2                            |
| Participant 5           | 16-20              | Primary school qualification               | No                                                      | Unemployed               | Grandparent and relative      | In a relationship, not living together | 1                            |
| Participant 6           | 21-25              | Primary school qualification               | No                                                      | Employed                 | Sibling                       | In a relationship, not living together | 1                            |
| Participant 7           | 21-25              | Tertiary qualification                     | Yes                                                     | Unemployed               | Parent                        | In a relationship, not living together | 2                            |
| Participant 8           | 21-25              | Secondary school qualification             | No                                                      | Unemployed               | Partner                       | In a relationship and living together  | 2                            |
| Participant 9           | 16-20              | Some primary school                        | No                                                      | Unemployed               | Parent and sibling            | In a relationship, not living together | 2                            |
| Participant 10          | 21-25              | Secondary school qualification             | No                                                      | Unemployed               | Parent and siblings           | In a relationship, not living together | 2                            |

|                |       |                                |     |            |                       |                                        |   |
|----------------|-------|--------------------------------|-----|------------|-----------------------|----------------------------------------|---|
| Participant 11 | 21-25 | Secondary school qualification | No  | Unemployed | Child                 | Single                                 | 2 |
| Participant 12 | 21-25 | Tertiary qualification         | Yes | Employed   | Partner               | In a relationship and living together  | 2 |
| Participant 13 | 21-25 | Some primary school            | No  | Unknown    | Partner               | In a relationship, and living together | 1 |
| Participant 14 | 21-25 | Secondary school qualification | Yes | Employed   | Parent                | In a relationship, not living together | 1 |
| Participant 15 | 21-25 | Some primary education         | No  | Unknown    | Parent and relative   | In a relationship, not living together | 2 |
| Participant 16 | 16-20 | Secondary school qualification | Yes | Unknown    | Parents and relatives | In a relationship, not living together | 1 |
| Participant 17 | 16-20 | Secondary school qualification | Yes | Unknown    | Grandparents          | In a relationship, not living together | 1 |
| Participant 18 | 26-30 | Secondary school qualification | No  | Unemployed | Child                 | In a relationship, not living together | 2 |



## 1. Relationships during pregnancy

### 1.1. Behavioural response of partner following disclosure of pregnancy

The narratives of the participants indicated that most of the participants' pregnancies were unplanned. Despite this, most participants reported feeling happy about their pregnancies. Participants described feeling surprised and shocked when they learned about their pregnancy, and their subsequent meaning-making about their pregnancies tended to reflect overall relationship dynamics. The young women were worried about disclosing the pregnancies to their partners and feared getting negative reactions. However, many of the young women reported that their partners responded with great happiness and joy to the news of their pregnancy and their relationships with their partners remained stable. Thus, the partners' behavioural response made the young women feel supported and safe in their relationships, fostering feelings of happiness and acceptance of the pregnancy and translating into positive wellbeing for the participants.

*“Things are fine between me and my partner, normal as before. Since he accepted, he feels like he is okay, because he is also very supportive.”* (Participant 1, 21-25 years old).

*“He is also excited because it's what he's been hoping for and to him it's the first child. We're all okay, and also we stuck together, he's supportive. We stay together, we do all things together, we're not apart; only if he's at work. Like we're all on the same page.”* (Participant 2, 21-25 years old).

286 One of the young women's narratives showed that her partner's family had wanted her to fall  
287 pregnant which led to plans of marriage, although the young woman had not actually married her  
288 partner when the interview took place.

289 *"The pregnancy was something that they wanted to plan, yeah, because the guy came to our*  
290 *home and took out some, it's not lobola [customary payment for marriage], but he was just*  
291 *introducing himself and his family"* (Participant 6, 21-25 years old).

292 However, contrary to these findings, other participants indicated that their relationships with their  
293 partners changed following the disclosure of their pregnancy, as their partners' reactions changed  
294 how the women viewed the relationship as opposed to how they viewed the pregnancy. Partners  
295 distanced themselves from the young women resulting in a dissolution of the relationship. Such  
296 circumstances resulted in the young women having negative wellbeing and not accepting their  
297 pregnancies.

298 *"My relationship with my partner was fine, until I was pregnant. I told him about the*  
299 *pregnancy and he did not want to be involved, and I just cancelled him out of my life."*  
300 (Participant 3, 16-20 years old).

301 *"I told the child's father that I am pregnant then he decided that we should stop seeing each*  
302 *other. He said to me in March, he does not want this child, he won't be able to help me so*  
303 *it's best that I get an abortion, so I asked him that when I get an abortion, am I supposed*  
304 *to do it alone, because after that you have to get me cleansed, and then he said to me that*  
305 *I will find my own way, he is not interested, I must just leave him alone."* (Participant 4, 16-  
306 20 years old).

307

308 Another distinctive feature emerging in one of the narratives showed that although the young woman was  
309 receiving instrumental support from her partner, she had previously thought of terminating the pregnancy  
310 given the change in her partner's behaviour towards her following her disclosure of the pregnancy to him.

311 *“After I told him I was pregnant in April he started behaving strangely. He wasn't warm.”*

312 (Participant 13, 21-25 years old).

313

## 314 **1.2. Behavioural response of family following disclosure of** 315 **pregnancy**

316 Most participants reported that their families were shocked at the news of the pregnancy while  
317 some reported that their families were highly disappointed with them as they had wished that the  
318 young women could have focused on advancing their education or career. Despite this  
319 circumstance, the relationships between the young women and their family members remained  
320 stable and most were resident in the same households as their families and indicated feeling  
321 supported by their families and also had a sense of closeness which contributed positively to their  
322 pregnancy care and wellbeing. Most participants could confide and seek guidance from their  
323 families and this played a significant role in their pregnancy care and wellbeing:

324 *“I thought that my parent was going to be angry or chase me away or something, but then my*  
325 *parent sat down and spoke to me and told me to keep it, because my parent has never made*  
326 *anyone do it, my parent is the first born so why does my parent have to judge me, life will*  
327 *go on and we will be alright.”* (Participant 4, 16-20 years old).

328 “My parents asked me that they heard my grandparent telling them that I am pregnant and  
329 I said yes I am pregnant. My parent said okay, there is nothing I can do since you are  
330 already pregnant. I will not tell you to abort, when you are pregnant, you are pregnant. A  
331 baby doesn’t have to be aborted and then my parents said that they will support me where  
332 they are able to support me, and that I will understand, and I told my parent that I don’t  
333 have a problem as long as you are going to support me, which is the only thing that I need,  
334 and that was it.” (Participant 8, 21-25 years old).

335 “My relatives said whatever decision I take they will support me, whether I keep the baby or  
336 not.” (Participant 16, 16-20 years old).

337  
338 Contrary to these findings, the narrative of one participant showed that her relationship with her  
339 family changed drastically following disclosure of her pregnancy, resulting in a dismantled  
340 relationship and poor communication, and the participant experiencing negative emotions.

341 “My parent she was also disappointed, very disappointed I won’t lie but not as much as my  
342 other parent, my parent was really like shattered, like yoh in so much disbelief, my parent  
343 didn’t believe. It was hectic, hectic to a point where my parent cut me off financially, uh  
344 nobody spoke to me until now that I’m 7... like last month when I was 7 months; so nobody  
345 spoke to me basically for like 4 or 5 or 6... ja 3 months.” (Participant 17, 16-20 years old).

### 347 **1.3. Sense of emotional security**

348 The stories of the respondents indicated that they felt a sense of emotional security around their  
349 pregnancies. An interpretation of their narratives is that this sense of security and positive

350 wellbeing stems from the fact that most participants have good social connections with family  
351 members and sexual partners. The presence of families and partners in the participants' lives during  
352 their pregnancy has led into increased feelings of comfort, joy, satisfaction and positive self-  
353 awareness. This support and close relationships have also helped them to bond with their unborn  
354 babies and to have increased pregnancy acceptance and positive wellbeing.

355  
356 *“I’m happy, ja; like there’s nothing that I can think about because a baby is a gift and I had*  
357 *to accept that it’s mine. I have a life inside of me I must take care of myself”* (Participant 7,  
358 21-25 years old).

359  
360 *“I feel great because like I’m carrying a fully-fledged human being, one that breathes and*  
361 *is alive, ja”* (Participant 5, 16-20 years).

## 362 363 **2. Network Involvement**

### 364 **2.1. Emotional and instrumental support**

365 An exploration of the participants' narratives showed that both partners and families of the  
366 pregnant young women are a key pillar in supporting the young women during their pregnancy  
367 and helping them navigate through challenges associated with pregnancy. An interpretation of their  
368 narratives shows that although the participants received financial support from their families and  
369 partners, participants mostly received emotional support which contributed significantly to their  
370 emotional wellbeing. The narratives also showed that some participants received most support

371 from their partners, some from their families and some had an equal balance of support from both  
372 networks. In addition, partner and family engagements included provision of funds to meet  
373 healthcare needs, food security, and provision of a conducive living environment. These narratives  
374 suggest that partners and families demonstrated increased understanding and concern for maternal  
375 care and wellbeing of the young women during their pregnancies, which contributed immensely to  
376 positive pregnancy-related mental changes, being happy and accepting the pregnancy. This could  
377 potentially contribute to engagement in healthy behaviours, which will positively contribute to a  
378 successful delivery of the baby and positive post-partum care.

379 *“The support I get from my parent, it is better. Makes everything easier. My parent cooks*  
380 *for me and makes sure I eat healthy.”* (Participant 10, 21-25 years old).

381  
382 *“My partner supports me, he’s there emotionally, physically, financially he supports me with*  
383 *everything that I need, he is there, we talk, his there, he is open, yeah. I am also under his*  
384 *medical aid.”* (Participant 6, 21-25 years old).

385  
386 *“He is just strong at being a very supportive partner. In terms of my education and job hunting*  
387 *and he has been watching my diet since pregnancy. He is my dietician on that one,*  
388 *emotional support he is there.”* (Participant 12, 21-25 years old).

389 Although Participant 12’s partner plays a key role in providing her with support in terms of her  
390 furthering her education, looking for employment and ensuring that she participates in healthy

391 eating behaviours and providing for her financially, the participant indicated that her partner is not  
392 emotionally invested in the “physical pregnancy”.

393 *“He doesn’t want to have those intimate experiences or moments with the baby. Because*  
394 *sometimes okay, the first time I experienced the baby kicking, I asked him to come and feel*  
395 *and he was just okay. He doesn’t ask much so I decided I’m no longer inviting him. He*  
396 *does ask on when last I felt the baby kicking and I would tell him that I felt it earlier on.*  
397 *He would then say I didn’t tell him but to me it would make no difference because he just*  
398 *touches my stomach and say okay!”*. (Participant 12).

399 In addition to receiving both instrumental and emotional care from their family members and  
400 sexual partners, two participants indicated also receiving support from the families of their sexual  
401 partners. Partners’ families showed concern, acceptance, affection and warmth to the participants  
402 and also provided them with emotional support which upon further interpretation suggests that  
403 they felt a sense of responsibility and obligation towards the unborn child.

404 *“My partner, my family and partner’s family support me emotionally. When I have something*  
405 *that bothers me from home or with my friends, I speak to him, and he is able to support me.*  
406 *Makes me feel happy cause it is rare to find someone who is there with you and support*  
407 *you, especially during tough times. Yes, I am able to talk to them.”* (Participant 1, 21-25  
408 years old).

409  
410 *“I think they are giving me love and they are trying to make me feel comfortable with the*  
411 *pregnancy, because at first I was like no, my age and a second child, I won’t be able to,*  
412 *and then my parent, my partner’s parent, they are there for me, that it’s something that*

413 *happens, that you want to study further, it's not something that will stop, like they give me,*  
414 *they encourage me you see, we are there, we will stay with the child, you can carry on with*  
415 *what you want to do and whatnot and whatnot, you see, so yeah.” (Participant 10, 21-25*  
416 *years old).*

417 Despite these two narratives, an account of one participant showed that she has never had a  
418 meaningful connection with the father in either of her two pregnancies, nor received any  
419 instrumental help from him, his family or her own family. Such adversities have affected her  
420 emotional wellbeing resulting in her feeling less happy about her pregnancy.

421 *“I've been having fights with the baby's father, so I have lost interest in the pregnancy.*  
422 *Another thing is the lack of support from his family and mine. I sometimes feel depressed*  
423 *like sad, I lost hope and I even regret why I fell pregnant.” (Participant 11, 21-25 years*  
424 *old).*

## 426 **2.2. Information support**

427 The majority of the participants reported receiving peer support through friends who provided  
428 support to the participants through sharing knowledge based on their own previous experiences,  
429 emotional support, social interaction or practical help and information on pregnancy care and  
430 pregnancy education from trial staff (details about intervention and control arms removed from  
431 quotes to protect blinding). An interpretation of the narratives brings forth the argument that the  
432 information support that the young women have received from the trial and health services has



433 contributed greatly to them having positive feelings about their pregnancies, feeling less isolated  
434 and having improved emotional wellbeing; this may subsequently lead to increased parenting  
435 capabilities.

436 *“I got most of the information from [the trial]. That is the one that made me understand most*  
437 *about the baby. That when the baby gets to certain months, they can listen to sounds, they*  
438 *can bond with you, the hair grows.”* (Participant 3, 16-20 years old).

439 *“The information that I have is about the growth of the baby, the change of the woman’s*  
440 *baby, I got it from the clinic, obviously the card that I have, and then how the belly grows,*  
441 *I have got a book from [the trial], we went through a lot of pages, it shows which month*  
442 *the baby grows like this.”* (Participant 6, 21-25 years old).

443 *“I got support from [the trial] and the clinic. On how to raise the child and having to*  
444 *breastfeed the baby up until six months for them to be healthy. Like how I am supposed to*  
445 *eat, I must avoid stress most of the time.”* (Participant 14, 21-25 years old).

446  
447 Other participants reported that they received information on pregnancy care from their friends.  
448 These narratives showed that the emotional connection that they have formed with friends who  
449 share similar experiences of pregnancy has helped them respond directly to their emotional needs,  
450 which has contributed greatly to positive maternal care and wellbeing.

451 *“My friends fell pregnant when we were still at school, and so we talk about everything.*  
452 *They are also open. I have open friends. So if we have challenges, we talk and help each*  
453 *other. So most of the information I get from them.”* (Participant 1, 21-25 years old).

454 *“Some of the information I got it from my other friend. She has a baby so she has the*  
455 *experience.”* (Participant 18, 26-30 years old).

456 Some participants also received information support from their families around pregnancy care,  
457 through families imparting information on various traditional or cultural pregnancy practices that  
458 the participants had to follow. The women’s narratives around this showed that the cultural  
459 knowledge they possess around pregnancy has markedly influenced their pregnancy experiences  
460 and related meaning-making. In particular, it has resulted in young women accepting their  
461 pregnancies and protecting their health or pregnancies from a spiritual perspective.

462 *“The cultural practices that we follow at home and in my church during pregnancy is that*  
463 *they tie you with a band on your waist to protect you, you drink water which they prayed*  
464 *over, in case you come across evil and being pregnant, the baby catches a lot of things.”*  
465 (Participant 1, 21-25 years old).

466 *“My parent gave me remedies to drink and waist braces. My parent said they protect the*  
467 *child from evil spirits.”* (Participant 9, 16-20 years old).

468 *“My family took me to ‘someone’ (traditional healer) just so they can ‘strengthen my*  
469 *pregnancy’. He said I must come with milk and eggs, ja and then he mixed them and he*  
470 *said I must bathe with them, and then he said I must also bring Vaseline as well, and then*  
471 *he mixed it I can’t remember what herbs he used, but then told me to lather my body with*  
472 *it every night.”* (Participant 13, 21-25 years old).

473                    *“There is a man that my parent took me to. He gave me water to drink. Water mixed with*  
474                    *some soil and a string. It was to tie the pregnancy because they suspected that I might*  
475                    *miscarry this one as well.”* (Participant 14, 21-25 years old)

476                    *“My elders do tell me that I don’t have to show my stomach off all the time because people*  
477                    *out there can prevent me from delivering the baby and all that stuff; ja and also that I*  
478                    *should wash myself with ‘isiwasho’ (traditional medicine infused water). It’s to protect the*  
479                    *baby they say, ja and protect delivery.”* (Participant 16, 16-20 years old).

480                    One participant reported that she received no information support from peers, health services,  
481                    members of her family or from her friends, but gathered the information herself through her own  
482                    learned experiences during her first pregnancy.

483                    *“For me it happened naturally. It was just general knowledge, having to understand things*  
484                    *the way they should be. With my firstborn, I was breastfeeding him and I learned how to*  
485                    *take care of him.”* (Participant 11, 21-25 years old).

486

## 487                    **Discussion**

488                    The study’s objective was to explore the experiences of young females, in particular, receipt of  
489                    social support, and its effect on pregnancy care and wellbeing during the prenatal period, through  
490                    a phenomenological approach, in the context of Soweto, South Africa. The findings demonstrate  
491                    that support from members of their various relationship networks contributed greatly to the young  
492                    women’s pregnancy care and emotional wellbeing. Such support was found to be available to most

493 participants of the study, even though the support that they received either from their partner or  
494 family, and the type of support that they received (instrumental, emotional and informational  
495 support) somewhat varied. This contributes greatly to young mothers having increased acceptance  
496 of their pregnancies and a greater sense of potential parental efficacy (36).

497  
498 These findings address a critical gap in the literature, since the nature of social support has not  
499 previously been explored from a qualitative perspective in South Africa. It is pivotal to acquire a  
500 nuanced comprehension of these interactions and their role in maternal pregnancy care and  
501 wellbeing since many young women face uncertainty about their emotional and cognitive readiness  
502 in assuming a parental role (10). These cognitions and emotions do not exist in isolation but tend  
503 to be influenced by one's interactions with various individuals namely friends, family members,  
504 sexual partners and community members (10). Previous studies in the South African context have  
505 mostly focused on the association between depressive symptomatology and social support in the  
506 prenatal period (30, 73, 74) and social support among pregnant young women, including women  
507 living with HIV (46, 75). Other quantitative research on social support in pregnancy has mostly  
508 been conducted in mainly in non-African high-income settings (10) where social support has been  
509 measured quantitatively and where measures of social support have been applied generically with  
510 lack of relevance to a particular population (76).

511  
512 The novelty of this study was therefore its qualitative exploration of the type of social and its source  
513 perceived by young pregnant women in South Africa, and how this had an impact on their  
514 pregnancy care and wellbeing. Exploring pregnant young women's social receipt within the  
515 context of Soweto given that the area is largely a historically underprivileged high-density peri-

516 urban area in South Africa was vital, where young females are particularly afflicted by gender  
517 inequality, impoverishment, low educational attainment, poor or lack of social capital, and and  
518 economic disadvantages (77, 78). These social issues ultimately may expose them to gender-based  
519 violence and early pregnancy, which have both become the norm in South Africa (77, 78).  
520 Therefore, it was important to ground the narrative accounts of the young women within the  
521 specific sociocultural context of Soweto, and within their experiences. The application of an  
522 interpretive phenomenological approach has helped provide new insight as it has shed light on  
523 realities and meaning-making around pregnancy and receipt of social support in this context.

524  
525 It was further found in the study that partner and family behavioural responses to pregnancy  
526 disclosure and type of social support that the young women received from these social networks,  
527 played a significant role in their emotional wellbeing as well as in the young women taking an  
528 initiative to focus on caring for their pregnancy and initiating antenatal care. This aligns with  
529 evidence indicating the major influence that sexual partners and family members have in young  
530 women's pregnancy care, and their physical and psychological wellbeing (37, 79-85). Also,  
531 paternal or family support and stable relationships may mediate or combat distress on expectant  
532 women which may reduce the risk of experiencing a poor birth outcome (86). This type of support  
533 thus has the potential to increase their likelihood of experiencing positive birth outcomes and also  
534 encourages young women to engage in positive pregnancy care behaviours.

535  
536 Our findings on father support are congruent to other literature which has shown that partner  
537 support, stability and dependability plays a key role in positive maternal behaviours and acceptance  
538 of pregnancy (87). Moreover, an engaged partner who cares about the process of pregnancy

539 contributes positively to the psychological health and health behaviours of expectant females,  
540 which subsequently results in positive pregnancy experiences (88). Thus it can be suggested that  
541 young expectant females value the attachment that they have with their partners as they largely  
542 deem these supportive networks as playing a key role in helping them to cope better with their  
543 pregnancies. An unanticipated finding emerging from our findings was that most expectant females  
544 reported receiving emotional and instrumental support from their sexual partners following  
545 disclosure of their pregnancy, with partners accepting the pregnancies and having strengthened and  
546 stable relationships with their partners.

547  
548 Male partners were mostly cited as the main sources of social support with the type of support  
549 received being of an emotional and instrumental nature. These findings seem contradictory to what  
550 has been observed in previous literature, which indicates that unmarried fathers have increased  
551 odds of being less involved during pregnancy than fathers who are in a marital union, thus having  
552 no obligation towards providing social support to the mother during pregnancy (89, 90). Our  
553 findings around partner support were also highly unanticipated given that intimate partner violence  
554 is another social ill in South Africa which has partly contributed to young women being exposed  
555 to early childbearing due to unequal power relations and the power of sexual coercion. This  
556 compromises women's sexual health as women who are in relationships characterized by intimate  
557 partner violence cannot employ their autonomy when it comes to the prevention of pregnancy and  
558 contraceptive or condom use (90).

559  
560 Expectant fathers have received limited attention in South African literature with respect to their  
561 supportive role during pregnancy (91-93) with studies viewing fatherhood as only starting

562 postpartum (94, 95). Furthermore, South Africa is largely deemed as a country globally that is  
563 characterized by high levels of father absenteeism (96-98) which can be partly traced back to the  
564 apartheid regime, urbanization and labor migration, which had a strong impact on family life and  
565 composition and changed the manner in which families functioned, with these changes being more  
566 prominent in the roles of fathers, mothers and extended family members (99, 100). This lack of  
567 participation in parenthood stems from the fact that most young fathers never knew their fathers  
568 which has contributed greatly to their lack of guidance and experience on father roles and  
569 responsibilities (100). Other constructs of fatherhood deem male emotional and nurturing forms of  
570 support as “soft” behaviours (101) which suggests that fathers have to be emotionally distant (102).  
571 In addition, non-involvement of young fathers can be attributed to the increase in poorly paid,  
572 unprotected and insecure jobs and enduring rates of impoverishment and inequity in South Africa  
573 that place men at a disadvantage of being able to provide adequate care to their families (103,  
574 104). Of note, a previous study focusing on out of work and casual working young males in an  
575 urban area of South Africa showed that some men have abandoned their paternal responsibilities  
576 on the grounds that child support grants in the country have come to substitute men’s roles as  
577 “providers” (105). Our findings regarding the role of partners’ support during pregnancy indicate  
578 that further research is warranted to explore this role further.

579  
580 Although some participants in this study reported receiving emotional and instrumental support  
581 from their families, other participants reporting strained relationships with their families. A  
582 possible explanation for this is that families punish young girls who fall pregnant through giving  
583 them poor or no support which leads to challenges for young mothers to accept their pregnancies  
584 and engage in positive maternal behaviours (106). This is because premarital childbearing has been

585 largely associated with social stigma and familial shame (107). Moreover, early childbearing  
586 among young women in particular, from a socioeconomic standpoint, has been found to have  
587 unfavorable results on the child, the young mother and extended family members (107-109). This  
588 is because when a young woman is unmarried, the young mother and her family shoulder the  
589 financial burden of childrearing (110).

590  
591 The composition of household members and the number of members in the household have been  
592 found to affect fertility behaviour significantly (111). South Africa has dynamic household living  
593 arrangements, fewer people entering marital unions, and a rise in households in which adult  
594 females are the sole or main income generators and decision-makers (112). In South Africa, the  
595 role of the family has changed over time (100, 113) which has resulted in extensive changes in  
596 living arrangements and familial responsibilities (114) and some families experiencing major  
597 challenges in providing comprehensive care to their children, attributable to societal problems  
598 associated with poverty, large family sizes, the HIV/AIDS pandemic and dismantling of the  
599 nuclear family unit. These considerations need to be taken into account especially since these  
600 factors can all serve as a set of varied and inter-related factors that can influence fertility behaviour  
601 and outcomes of young women.

602  
603 This current study found that other young women received support from both their sexual partners  
604 and families while other participants either reported receiving support only from their partners or  
605 only from their families. These findings suggest experiences of receipt of social support among  
606 young women differ greatly, with the type and source of social support not being universal. For  
607 instance, some young women experience pressure from their peers and forces to engage in sexual



608 activities in fear of their partners who threaten to end the relationship often resulting in unintended  
609 pregnancies or termination (108, 115-117) while other young expectant females' experience of  
610 pregnancy involves a denial of paternity (106). Conversely, other women have positive experiences  
611 due to their partners accepting paternity and having an increased need to have a relationship with  
612 their children, which is often a decision that is influenced by the partner's family  
613 (67).

614  
615 These experiences in turn affect young women's acceptance or non-acceptance of their pregnancies  
616 given that the experience of childbearing among young women, its causes and consequences are  
617 not uniform (106). Given that early childbearing among young women is a phenomenon that is  
618 embedded within society (67) any changes that occur in society and any perceptions that members  
619 of communities hold about early childbearing among young women, affect how young expectant  
620 females experience pregnancy and motherhood (106). Also, complexities around communication  
621 pertaining to young women's reproductive health increase their susceptibility to early childbearing  
622 and affect how they experience pregnancy. It is thus pivotal to consider the significance of each  
623 source of support and its well-being individually because pregnant young women are not a  
624 homogenous group. They have a variety of demographic and familial characteristics, different  
625 relations with their families and partners and the experiences and context in which they live may  
626 differ which contributes greatly to engaging in positive maternal behaviours or lack thereof.

627  
628 Since experiences of pregnancy are vastly different and complexities around family and partner  
629 dynamics create different realities for these young women, social support needs to be relevant to  
630 the different realities of young women. Focusing attention on pregnant women to identify those

631 who experience poor levels of social support along with the provision of community-based support  
632 services in collaboration with partners and families, may help foster positive behavioural outcomes  
633 with pregnant women taking an initiative to focus on caring for their pregnancy and initiating  
634 antenatal care. Furthermore, interventions that urge young women to use personal networks are  
635 needed. Health professionals can engage directly with partners and families of young women, by  
636 providing information and training on how to support the young women whilst being sensitive to  
637 the beliefs and cultural values of these sources of support. Health workers should also be  
638 encouraged to mobilize the broader communities of these young women through mass-media  
639 campaigns and discourses that promote the need for the supportive role of partners and families  
640 and also empower young women to have agency and autonomy over the decisions they make on  
641 their reproductive health.

642  
643 The strength of this study is the application of the interpretive phenomenological approach, as it  
644 helped the researchers to gain a nuanced understanding of participants' views and meaning-making  
645 around the phenomenon under study. This provides in-depth insights into a particular context,  
646 although transferability to other contexts should not be assumed, particularly since participants  
647 were part of a trial. The study's limitation was that the support networks of the young women were  
648 not included as study participants. These individuals could also provide their perspectives on how  
649 they believe their provision of social support has had a major influence in the pregnancy care and  
650 wellbeing of the young mothers.

## 654 **Conclusion:**

655 The existence of social support has a major influence on pregnancy care and wellbeing and a lack  
656 thereof can pose significant risks on both maternal and child health. Focusing on social support  
657 could help contribute to reducing maternal mortality rates and achieving reproductive health  
658 accessibility universally. Pregnant women who receive sufficient social support from immediate  
659 networks have increased potential to embrace and give attention to pregnancy-related changes.  
660 This will, in turn, foster positive behavioural outcomes that encourage engaging in good pregnancy  
661 care practices and acceptance of motherhood. The important role of maternal support during  
662 pregnancy suggests that the wider community needs to be educated by policymakers and healthcare  
663 providers about the importance of partner, family and peer support in order to minimize risks that  
664 may affect maternal pregnancy care and wellbeing. Future research should be conducted that  
665 explores the dynamics of social support within various family structures. Improving receipt of  
666 social support by young mothers could enhance the promotion of physical and mental health of  
667 mothers which would subsequently result in the engagement of healthy behaviours in the perinatal  
668 period and positive birth outcomes.

## 670 **Acknowledgements**

671  
672 This study was supported by the South African Medical Research Council, and the Canadian  
673 Institutes of Health Research. SAN is supported by the DSI-NRF Centre of Excellence in Human  
674 Development.

677

678

679

## References

680

1. Agostini F, Neri E, Salvatori P, Dellabartola S, Bozicevic L, Monti F. Antenatal depressive symptoms associated with specific life events and sources of social support among Italian women. *Maternal and child health journal*. 2015;19(5):1131-41.

681

682

2. Skurzak A, Kicia M, Wiktor K, Iwanowicz-Palus G, Wiktor H. Social support for pregnant women. *Pol J Public Health*. 2015;125:169-72.

683

684

3. Zauszniewski JA. Stress experiences and mental health of pregnant women: the mediating role of social support. *Issues in mental health nursing*. 2019.

685

686

4. McLeish J, Redshaw M. Mothers' accounts of the impact on emotional wellbeing of organised peer support in pregnancy and early parenthood: a qualitative study. *BMC pregnancy and childbirth*. 2017;17(1):1-14.

687

688

5. Diego MA, Field T, Hernandez-Reif M, Cullen C, Schanberg S, Kuhn C. Prepartum, postpartum, and chronic depression effects on newborns. *Psychiatry: Interpersonal and Biological Processes*. 2004;67(1):63-80.

689

690

6. Chang S-R, Kenney NJ, Chao Y-MY. Transformation in self-identity amongst Taiwanese women in late pregnancy: a qualitative study. *International Journal of Nursing Studies*. 2010;47(1):60-6.

691

692

7. Ibanez G, Blondel B, Prunet C, Kaminski M, Saurel-Cubizolles M-J. Prevalence and characteristics of women reporting poor mental health during pregnancy: findings from the 2010 French National Perinatal Survey. *Revue d'Épidémiologie et de Santé Publique*. 2015;63(2):85-95.

693

694

8. Lagadec N, Steinecker M, Kapassi A, Magnier AM, Chastang J, Robert S, et al. Factors influencing the quality of life of pregnant women: a systematic review. *BMC pregnancy and childbirth*. 2018;18(1):114.

695

696

9. Alzboon G, Vural G. The Experience of Healthy Pregnancy in High Parity Women: A Phenomenological Study in North Jordan. *Medicina*. 2021;57(8):853.

697

698

10. Mbatha K. Social support as psychological mediator among African black women who have recently given birth: Citeseer; 2014.

699

700

11. Rini C, Schetter CD, Hobel CJ, Glynn LM, Sandman CA. Effective social support: Antecedents and consequences of partner support during pregnancy. *Personal Relationships*. 2006;13(2):207-29.

701

702

12. Reblin M, Uchino BN. Social and emotional support and its implication for health. *Current opinion in psychiatry*. 2008;21(2):201.

703

704

13. Edmonds JK, Paul M, Sibley LM. Type, content, and source of social support perceived by women during pregnancy: Evidence from Matlab, Bangladesh. *Journal of health, population, and nutrition*. 2011;29(2):163.

705

706

14. Abadi MNL. Social support, Coping, and Self-Esteem in Relation to psychosocial factors: a study of health issues and birth weight in young mothers in Tehran, Iran: Department of Social Work, Umeå University; 2012.

707

708

15. Maharlouei N. The importance of social support during pregnancy. *Women's Health Bulletin*. 2016;3(1):1-.

709

710

711

712

713

714

- 717 16. Milgrom J, Hirshler Y, Reece J, Holt C, Gemmill AW. Social support—a protective factor for  
718 depressed perinatal women? *International journal of environmental research and public health*.  
719 2019;16(8):1426.
- 720 17. Rafiei N, Amini Rarani M, Eizadi F, Rafiey H, Seyedghasemi NS. Social support and its role in the  
721 prevention of depression and anxiety during pregnancy in Turkmen women. *International Journal of*  
722 *Biomedicine and Public Health*. 2019;2(4):75-80.
- 723 18. Asselmann E, Kunas SL, Wittchen H-U, Martini J. Maternal personality, social support, and  
724 changes in depressive, anxiety, and stress symptoms during pregnancy and after delivery: A  
725 prospectivelongitudinal study. *Plos one*. 2020;15(8):e0237609.
- 726 19. Nakamura A, Sutter-Dallay A-L, El-Khoury Lesueur F, Thierry X, Gressier F, Melchior M, et al.  
727 Informal and formal social support during pregnancy and joint maternal and paternal postnatal  
728 depression: data from the French representative ELFE cohort study. *International Journal of Social*  
729 *Psychiatry*. 2020;66(5):431-41.
- 730 20. Mountain RV, Zhu Y, Pickett OR, Lussier AA, Goldstein JM, Roffman JL, et al. Association of  
731 Maternal Stress and Social Support During Pregnancy With Growth Marks in Children’s Primary Tooth  
732 Enamel. *JAMA network open*. 2021;4(11):e2129129-e.
- 733 21. Renbarger KM, Place JM, Schreiner M. The Influence of Four Constructs of Social Support on  
734 Pregnancy Experiences in Group Prenatal Care. *Women's Health Reports*. 2021;2(1):154-62.
- 735 22. Robertson E, Grace S, Wallington T, Stewart DE. Antenatal risk factors for postpartum  
736 depression: a synthesis of recent literature. *General hospital psychiatry*. 2004;26(4):289-95.
- 737 23. Figueiredo B, Bifulco A, Pacheco A, Costa R, Magarinho R. Teenage pregnancy, attachment style,  
738 and depression: A comparison of teenage and adult pregnant women in a Portuguese series.  
739 *Attachment & Human Development*. 2006;8(2):123-38.
- 740 24. Lee AM, Lam SK, Lau SMSM, Chong CSY, Chui HW, Fong DYT. Prevalence, course, and risk factors  
741 for antenatal anxiety and depression. *Obstetrics & Gynecology*. 2007;110(5):1102-12.
- 742 25. Littleton HL, Breitkopf CR, Berenson AB. Correlates of anxiety symptoms during pregnancy and  
743 association with perinatal outcomes: a meta-analysis. *American journal of obstetrics and gynecology*.  
744 2007;196(5):424-32.
- 745 26. Leigh B, Milgrom J. Risk factors for antenatal depression, postnatal depression and parenting  
746 stress. *BMC psychiatry*. 2008;8(1):1-11.
- 747 27. Wahn EH, Nissen E. Sociodemographic background, lifestyle and psychosocial conditions of  
748 Swedish teenage mothers and their perception of health and social support during pregnancy and  
749 childbirth. *Scandinavian journal of public health*. 2008;36(4):415-23.
- 750 28. Grote NK, Bridge JA, Gavin AR, Melville JL, Iyengar S, Katon WJ. A meta-analysis of depression  
751 during pregnancy and the risk of preterm birth, low birth weight, and intrauterine growth restriction.  
752 *Archives of general psychiatry*. 2010;67(10):1012-24.
- 753 29. Rashid A, Mohd R. Poor social support as a risk factor for antenatal depressive symptoms among  
754 women attending public antenatal clinics in Penang, Malaysia. *Reproductive Health*. 2017;14(1):1-8.
- 755 30. Bedaso A, Adams J, Peng W, Sibbritt D. The relationship between social support and mental health  
756 problems during pregnancy: a systematic review and meta-analysis. *Reproductive health*.  
757 2021;18(1):1-23.

- 758 31. Kim TH, Connolly JA, Tamim H. The effect of social support around pregnancy on postpartum  
759 depression among Canadian teen mothers and adult mothers in the maternity experiences survey. *BMC*  
760 *pregnancy and childbirth*. 2014;14(1):1-9.
- 761 32. Maidaliza A, Susanti SS. Social Support Received by Postpartum Mothers in Indonesia: A  
762 Descriptive Phenomenological Study. 2020.
- 763 33. Mbekenga CK, Lugina HI, Christensson K, Olsson P. Postpartum experiences of first-time fathers  
764 in a Tanzanian suburb: a qualitative interview study. *Midwifery*. 2011;27(2):174-80.
- 765 34. Shefer T, Bhana D, Morrell R. Teenage pregnancy and parenting at school in contemporary South  
766 African contexts: Deconstructing school narratives and understanding policy implementation.  
767 *Perspectives in Education*. 2013;31(1):1-10.
- 768 35. VanDenBerg MP. Protective factors for teen mothers: relations among social support,  
769 psychological resources, and child rearing practices: Colorado State University; 2012.
- 770 36. Coert SL, Adebisi BO, Rich E, Roman NV. A comparison of the relationship between parental  
771 efficacy and social support systems of single teen mothers across different family forms in South African  
772 low socioeconomic communities. *BMC women's health*. 2021;21(1):1-11.
- 773 37. Leahy-Warren P, McCarthy G, Corcoran P. First-time mothers: social support, maternal parental  
774 self-efficacy and postnatal depression. *Journal of clinical nursing*. 2012;21(3-4):388-97.
- 775 38. Morikawa M, Okada T, Ando M, Aleksic B, Kunimoto S, Nakamura Y, et al. Relationship between  
776 social support during pregnancy and postpartum depressive state: a prospective cohort study. *Scientific*  
777 *reports*. 2015;5(1):1-9.
- 778 39. Ginja S, Coad J, Bailey E, Kendall S, Goodenough T, Nightingale S, et al. Associations between  
779 social support, mental wellbeing, self-efficacy and technology use in first-time antenatal women: data  
780 from the BaBBLeS cohort study. *BMC pregnancy and childbirth*. 2018;18(1):1-11.
- 781 40. Ngui E, Cortright A, Blair K. An investigation of paternity status and other factors associated with  
782 racial and ethnic disparities in birth outcomes in Milwaukee, Wisconsin. *Maternal and Child Health*  
783 *Journal*. 2009;13(4):467-78.
- 784 41. Alio AP, Kornosky JL, Mbah AK, Marty PJ, Salihu HM. The impact of paternal involvement on  
785 fetal-infant morbidity among Whites, Blacks and Hispanics. *Maternal and child health journal*.  
786 2010;14(5):735-41.
- 787 42. Alio AP, Mbah AK, Kornosky JL, Wathington D, Marty PJ, Salihu HM. Assessing the impact of  
788 paternal involvement on racial/ethnic disparities in infant mortality rates. *Journal of community health*.  
789 2011;36(1):63-8.
- 790 43. Ilska M, Przybyła-Basista H. Partner support as a mediator of the relationship between prenatal  
791 concerns and psychological well-being in pregnant women. 2017.
- 792 44. Falade-Fatila O, Adebayo AM. Male partners' involvement in pregnancy related care among  
793 married men in Ibadan, Nigeria. *Reproductive health*. 2020;17(1):1-12.
- 794 45. Kumar SA, Brock RL, DiLillo D. Partner support and connection protect couples during pregnancy:  
795 A daily diary investigation. *Journal of Marriage and Family*. 2021.
- 796 46. Hill LM, Maman S, Groves AK, Moodley D. Social support among HIV-positive and HIV-negative  
797 adolescents in Umlazi, South Africa: changes in family and partner relationships during pregnancy and  
798 the postpartum period. *BMC Pregnancy and childbirth*. 2015;15(1):1-9.

- 799 47. Granville G, Sugarman W. Someone in my corner: a volunteer peer support programme for  
800 pregnancy, birth and beyond. Final Evaluation Report In Parents 1st. 2012.
- 801 48. Montgomery P, Mossey S, Adams S, Bailey PH. Stories of women involved in a postpartum  
802 depression peer support group. *International Journal of Mental Health Nursing*. 2012;21(6):524-32. 49.  
803 Liu M-C, Kuo S-H, Lin C-P, Yang Y-M, Chou F-H, Yang Y-H. Effects of professional support on nausea,  
804 vomiting, and quality of life during early pregnancy. *Biological research for nursing*.  
805 2014;16(4):378-86.
- 806 50. Ekström AC, Thorstensson S. Nurses and midwives professional support increases with improved  
807 attitudes-design and effects of a longitudinal randomized controlled process-oriented  
808 intervention. *BMC pregnancy and childbirth*. 2015;15(1):1-9.
- 809 51. Bäckström C. Professional and social support for first-time mothers and partners during  
810 childbearing: Jönköping University, School of Health and Welfare; 2018.
- 811 52. Akinwaare MO, Ogbeye GB, Ejimofor N. Social Support During Pregnancy among Pregnant  
812 Women in Ibadan, Nigeria. *International Journal of Nursing, Midwife and Health Related Cases*.  
813 2019;5(1):14-26.
- 814 53. Hijazi HH, Alyahya MS, Al Abdi RM, Alolayyan MN, Sindiani AM, Raffee LA, et al. The Impact of  
815 Perceived Social Support During Pregnancy on Postpartum Infant-Focused Anxieties: A  
816 Prospective Cohort Study of Mothers in Northern Jordan. *International journal of women's  
817 health*. 2021;13:973.
- 818 54. Nicholls D. Qualitative research: part one—philosophies. *International Journal of Therapy and  
819 Rehabilitation*. 2009;16(10):526-33.
- 820 55. Tuohy D, Cooney A, Dowling M, Murphy K, Sixsmith J. An overview of interpretive  
821 phenomenology as a research methodology. *Nurse researcher*. 2013;20(6).
- 822 56. Abota TL, Gashe FE, Kabeta ND. Postpartum Women's Lived Experiences of Perinatal Intimate  
823 Partner Violence in Wolaita Zone, Southern Ethiopia: A Phenomenological Study Approach.  
824 *International journal of women's health*. 2021;13:1103.
- 825 57. Flood A. Understanding phenomenology. *Nurse researcher*. 2010;17(2).
- 826 58. Maggs-Rapport F. Combining methodological approaches in research: ethnography and  
827 interpretive phenomenology. *Journal of advanced nursing*. 2000;31(1):219-25.
- 828 59. Arghavanian FE, Roudsari RL, Heydari A, Bahmani MND. Men's confrontation with pregnancy  
829 from women's point of view: an ethno phenomenological approach. *Journal of Caring Sciences*.  
830 2019;8(4):231.
- 831 60. Lundgren I, Wahlberg V. The experience of pregnancy: a hermeneutical/phenomenological  
832 study. *The Journal of Perinatal Education*. 1999;8(3):12-20.
- 833 61. Giorgi A. One type of analysis of descriptive data: Procedures involved in following a scientific  
834 phenomenological method. *Methods*. 1989;1(3):39-61.
- 835 62. Groenewald T. A phenomenological research design illustrated. *International journal of  
836 qualitative methods*. 2004;3(1):42-55.
- 837 63. Draper C, Pioreschi A, Ware L, Lye S, Norris S. Pilot implementation of Bukhali: A preconception  
838 health trial in South Africa. *SAGE Open Medicine*. 2020;8:2050312120940542.
- 839 64. Grønlund J. The genesis of a football field: urban football in Soweto, South Africa. *Soccer &  
840 Society*. 2021;22(3):218-30.

- 841 65. Battersby J, McLachlan M. Urban food insecurity: A neglected public health challenge. *South*  
842 *African Medical Journal*. 2013;103(10):716-7.
- 843 66. Miller CL, Nkala B, Closson K, Chia J, Cui Z, Palmer A, et al. The Botsha Bophelo adolescent health  
844 study: a profile of adolescents in Soweto, South Africa. *Southern African journal of HIV medicine*.  
845 2017;18(1):1-10.
- 846 67. Jewkes R, Morrell R, Christofides N. Empowering teenagers to prevent pregnancy: lessons from  
847 South Africa. *Culture, health & sexuality*. 2009;11(7):675-88.
- 848 68. Taylor M, Jinabhai C, Dlamini S, Sathiparsad R, Eggers MS, De Vries H. Effects of a teenage  
849 pregnancy prevention program in KwaZulu-Natal, South Africa. *Health care for women*  
850 *international*.  
851 2014;35(7-9):845-58.
- 852 69. Amod Z, Halana V, Smith N. School-going teenage mothers in an under-resourced community:  
853 lived experiences and perceptions of support. *Journal of Youth Studies*. 2019;22(9):1255-71.
- 854 70. Software V. MAXQDA 2020. VERBI Software Berlin; 2019.
- 855 71. Wirihana L, Welch A, Williamson M, Christensen M, Bakon S, Craft J. Using Colaizzi's method of  
856 data analysis to explore the experiences of nurse academics teaching on satellite campuses.  
857 *Nurse Researcher (2014+)*. 2018;25(4):30.
- 858 72. KR P. Application of Colaizzi's Method of Data Analysis in Phenomenological Research.  
859 *MedicoLegal Update*. 2021;21(2).
- 860 73. Brittain K, Mellins CA, Phillips T, Zerbe A, Abrams EJ, Myer L, et al. Social support, stigma and  
861 antenatal depression among HIV-infected pregnant women in South Africa. *AIDS and Behavior*.  
862 2017;21(1):274-82.
- 863 74. Smith M, Mitchell AS, Townsend ML, Herbert JS. The relationship between digital media use  
864 during pregnancy, maternal psychological wellbeing, and maternal-fetal attachment. *PloS one*.  
865 2020;15(12):e0243898.
- 866 75. Mfusi S, Mahabeer M. Psychosocial adjustment of pregnant women infected with HIV/AIDS in  
867 South Africa. *Journal of Psychology in Africa*. 2000;10(2):122-45.
- 868 76. McDowell I. *Measuring health: a guide to rating scales and questionnaires*: Oxford University  
869 Press, USA; 2006.
- 870 77. Jewkes R, Vundule C, Maforah F, Jordaan E. Relationship dynamics and teenage pregnancy in  
871 South Africa. *Social science & medicine*. 2001;52(5):733-44.
- 872 78. Bhana D. "Girls are not free"—In and out of the South African school. *International Journal of*  
873 *Educational Development*. 2012;32(2):352-8.
- 874 79. Turner RJ, Sorenson AM, Turner JB. Social contingencies in mental health: A seven-year followup  
875 study of teenage mothers. *Journal of Marriage and Family*. 2000;62(3):777-91.
- 876 80. Serovich JM, Kimberly J, Mosack K, Lewis T. The role of family and friend social support in  
877 reducing emotional distress among HIV-positive women. *AIDS care*. 2001;13(3):335-41.
- 878 81. Glazier R, Elgar F, Goel V, Holzapfel S. Stress, social support, and emotional distress in a  
879 community sample of pregnant women. *Journal of Psychosomatic Obstetrics & Gynecology*.  
880 2004;25(34):247-55.



- 881 82. Milan S, Ickovics JR, Kershaw T, Lewis J, Meade C, Ethier K. Prevalence, course, and predictors of  
882 emotional distress in pregnant and parenting adolescents. *Journal of Consulting and Clinical*  
883 *Psychology*. 2004;72(2):328.
- 884 83. Rahman A, Chowdhury S. Determinants of chronic malnutrition among preschool children in  
885 Bangladesh. *Journal of biosocial science*. 2007;39(2):161-73.
- 886 84. Kathree T, Petersen I. South African Indian women screened for postpartum depression: a  
887 multiple case study of postpartum experiences. *South African Journal of Psychology*.  
888 2012;42(1):37-50. 85. Stapleton LRT, Schetter CD, Westling E, Rini C, Glynn LM, Hobel CJ, et al.  
889 Perceived partner support in pregnancy predicts lower maternal and infant distress. *Journal of*  
890 *family psychology*.  
891 2012;26(3):453.
- 892 86. Shah R, Mullany LC, Darmstadt GL, Mannan I, Rahman SM, Talukder RR, et al. Incidence and risk  
893 factors of preterm birth in a rural Bangladeshi cohort. *BMC pediatrics*. 2014;14(1):1-11.
- 894 87. Calderwood L, Kiernan K, Joshi H, Smith K, Ward K, Dex S, et al. Parenthood and parenting.  
895 *Children of the 21st century: from birth to nine months*. 2005.
- 896 88. Alio AP, Lewis CA, Scarborough K, Harris K, Fiscella K. A community perspective on the role of  
897 fathers during pregnancy: a qualitative study. *BMC pregnancy and childbirth*. 2013;13(1):1-11.
- 898 89. Cabrera N, Brooks-Gunn J, Moore K, West J, Boller K, Tamis-LeMonda CS. Bridging research and  
899 policy: Including fathers of young children in national studies. *Handbook of father involvement:*  
900 *Routledge*; 2012. p. 492-526.
- 901 90. Bottoman PE. *Pregnant women's construction of social support from their intimate partners*  
902 *during pregnancy: Rhodes University*; 2018.
- 903 91. Richter L. The importance of fathering for children. *Baba: men and fatherhood in South Africa*.  
904 2006:53-69.
- 905 92. Maman S, Moodley D, Groves AK. Defining male support during and after pregnancy from the  
906 perspective of HIV-Positive and HIV-Negative women in Durban, South Africa. *Journal of*  
907 *midwifery & women's health*. 2011;56(4):325-31.
- 908 93. Groves AK, McNaughton-Reyes HL, Foshee VA, Moodley D, Maman S. Relationship factors and  
909 trajectories of intimate partner violence among South African women during pregnancy and the  
910 postpartum period. *PLoS One*. 2014;9(9):e106829.
- 911 94. Clowes L. *Men and children: changing constructions of fatherhood in Drum magazine, 1951-1965*.  
912 *HSRC Press*; 2006.
- 913 95. Ratele K, Shefer T, Clowes L. *Talking South African fathers: A critical examination of men's*  
914 *constructions and experiences of fatherhood and fatherlessness*. *South African journal of*  
915 *psychology*.  
916 2012;42(4):553-63.
- 917 96. Richter L, Chikovore J, Makusha T. The status of fatherhood and fathering in South Africa.  
918 *Childhood education*. 2010;86(6):360-5.
- 919 97. Richter L, Desmond C, Hosegood V, Madhavan S, Makiwane M, Makusha T, et al. *Fathers and*  
920 *other men in the lives of children and families*. 2012.

- 921 98. Freeks FE. Die noodsaak van Skrifgefundeerde vaderskap as antwoord op die voortslepende  
922 probleem van vaderafwesigheid in Suid-Afrika. *Journal for Christian Scholarship= Tydskrif vir*  
923 *Christelike Wetenskap*. 2016;52(1):1-27.
- 924 99. Smit R. The impact of labor migration on African families in South Africa: Yesterday and today.  
925 *Journal of Comparative Family Studies*. 2001;32(4):533-48.
- 926 100. Sooryamoorthy R, Makhoba M. The family in modern South Africa: Insights from recent  
927 research. *Journal of Comparative Family Studies*. 2016;47(3):309-21.
- 928 101. Gregory A, Milner S. What is “new” about fatherhood? The social construction of fatherhood in  
929 France and the UK. *Men and masculinities*. 2011;14(5):588-606.
- 930 102. Šmídová I. Fatherhood as a social construction: Mapping the challenges to promoting good  
931 fatherhood. *European Fatherhood*. 2007.
- 932 103. Barchiesi F. Wage labor, precarious employment, and social inclusion in the making of South  
933 Africa's postapartheid transition. *African Studies Review*. 2008;51(2):119-42.
- 934 104. Barchiesi F. *Precarious liberation: Workers, the state, and contested social citizenship in*  
935 *postapartheid South Africa*: Suny Press; 2011.
- 936 105. Dawson HJ, Fouksman E. Labour, laziness and distribution: work imaginaries among the South  
937 African unemployed. *Africa*. 2020;90(2):229-51.
- 938 106. Mkhwanazi N. Revisiting the dynamics of early childbearing in South African townships. *Culture,*  
939 *health & sexuality*. 2014;16(9):1084-96.
- 940 107. Johnson-Hanks J. The lesser shame: abortion among educated women in southern Cameroon.  
941 *Social science & medicine*. 2002;55(8):1337-49.
- 942 108. Macleod CI, Tracey T. A decade later: follow-up review of South African research on the  
943 consequences of and contributory factors in teen-aged pregnancy. *South African Journal of*  
944 *Psychology*.  
945 2010;40(1):18-31.
- 946 109. Ndinda C, Ndhlovu T, Khalema NE. Conceptions of contraceptive use in rural KwaZulu-Natal,  
947 South Africa: lessons for programming. *International Journal of Environmental Research and*  
948 *Public Health*. 2017;14(4):353.
- 949 110. Jewkes R, Christofides N. Teenage pregnancy: Rethinking prevention. *HSRC Youth Policy Initiative*  
950 *Roundtable*. 2008;5.
- 951 111. Mönkediek B, Bras H. Family systems and fertility intentions: Exploring the pathways of  
952 influence. *European Journal of Population*. 2018;34(1):33-57.
- 953 112. Hall K, Richter L, Mokomane Z, Lake L. *South African Child Gauge 2018 children, families and the*  
954 *state collaboration and contestation*. University of Cape Town: Children’s Institute.[Online].  
955 Available at:  
956 [http ...](http://...); 2018.
- 957 113. Mokone J. Challenges experienced by grandparents raising grandchildren: An exploratory study.  
958 *Social Work/Maatskaplike Werk*. 2006;42(2).
- 959 114. Mathambo V, Gibbs A. Extended family childcare arrangements in a context of AIDS: collapse or  
960 adaptation? *AIDS care*. 2009;21(sup1):22-7.

- 961 115. Gevers A, Jewkes R, Mathews C, Flisher A. 'I think it's about experiencing, like, life': a qualitative  
962 exploration of contemporary adolescent intimate relationships in South Africa. *Culture, Health &*  
963 *Sexuality*. 2012;14(10):1125-37.
- 964 116. Morrell R, Bhana D, Shefer T. *Books and babies: Pregnancy and young parents in schools*: HSRC  
965 Press Cape Town; 2012.
- 966 117. Miller E, Decker MR, McCauley HL, Tancredi DJ, Levenson RR, Waldman J, et al. Pregnancy  
967 coercion, intimate partner violence and unintended pregnancy. *Contraception*.  
968 2010;81(4):31622.

969

970

## 971 **Supporting information**

972 **S1 Table. Themes focusing on young women's experiences of social support on pregnancy**  
973 **care and wellbeing.**

974 **S2 Table. Demographic Profile of the participants.**

975 **S3 Interview guide.**

976

## 977 **Data Availability Statement**

978 All data supporting our work is provided within the manuscript

979

980

## 981 **Funding**

982 This study was supported by the South African Medical Research Council and DSI-NRF Centre of  
983 Excellence in Human Development at the University of the Witwatersrand, Johannesburg. The  
984 funders had no role in preparation of the manuscript, study design, data collection and analysis.

985

## 986 **Competing interests**

987 The authors declare that they have no competing interests

988
